# Supplementary material for: Variable Copy Number, Intra-Genomic Heterogeneities and Lateral Transfers of the 16S rRNA Gene in Pseudomonas
Source: PLOS journal article supplement (doi:10.1371/journal.pone.0035647), 2012-04-24

**Figure S1. Southern blot analysis of rRNA operons in four *Pseudomonas* sp. strains. (A)** Genomic DNAs were cleaved using restriction enzymes and hybridized with the 23S 3'end probe as described in the text. Lane 1, MF0 strain cleaved with *Pst*I + *Mlu*I ; lane 2, MFY30 cleaved with *Apa*I ; lane 3, MFY32 cleaved with *Pst*I ; lane 4, R2f cleaved with *Cla*I. **(B)** Schematic positions of rRNA probes.

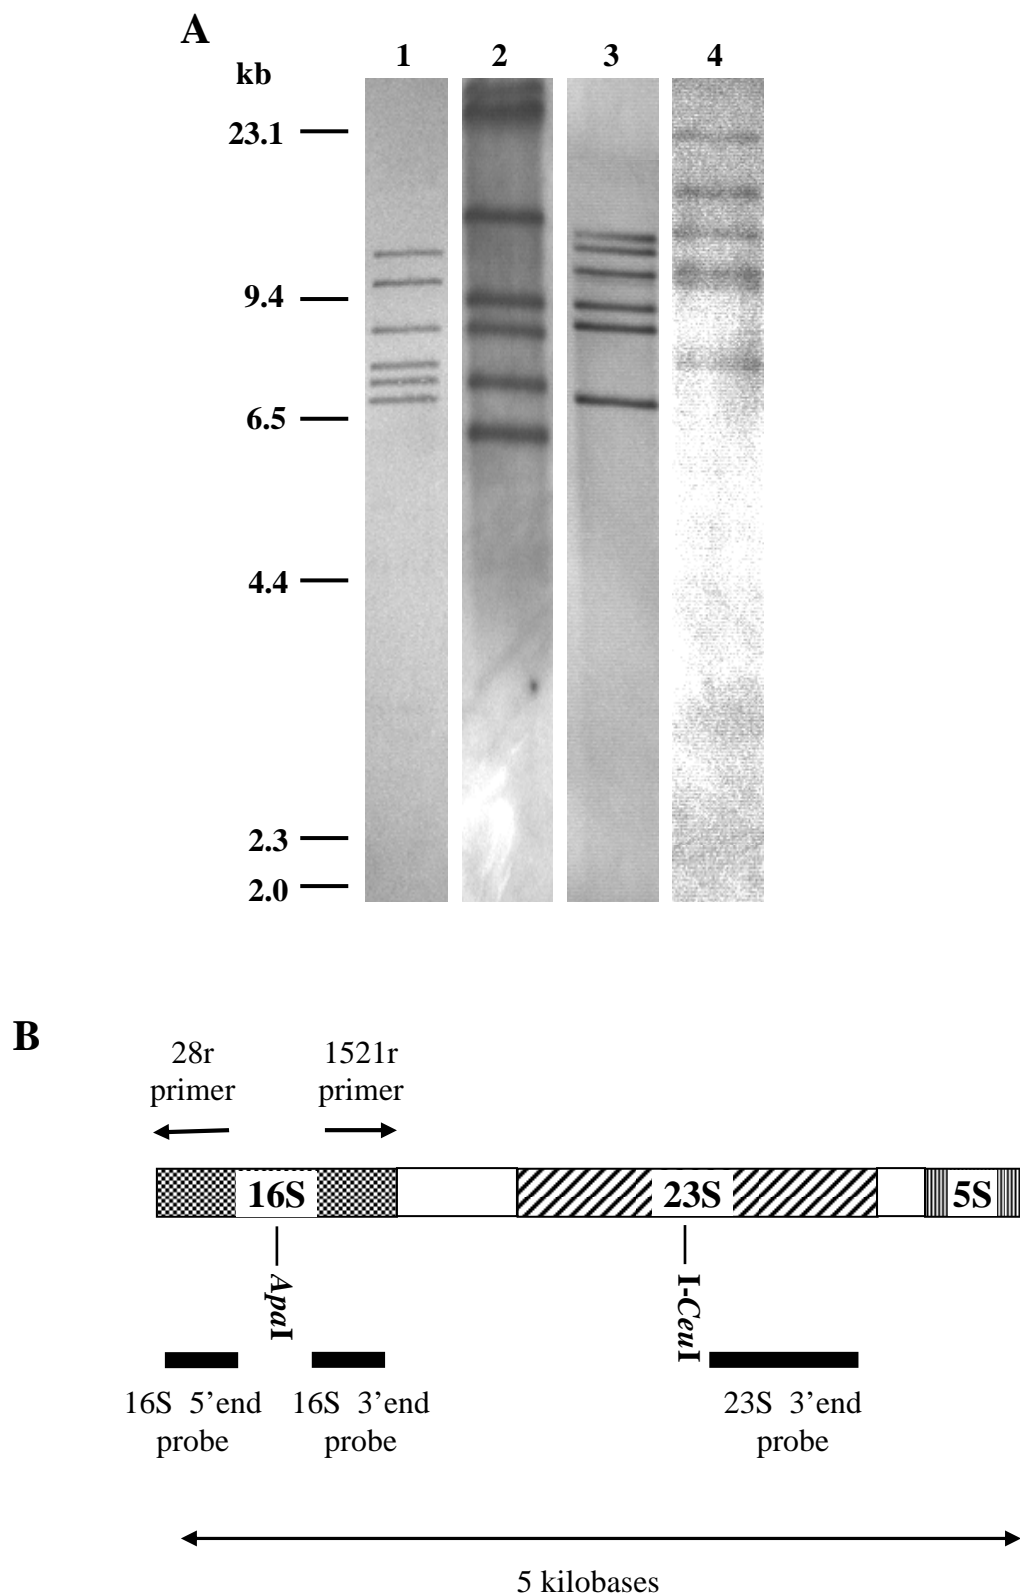

Supplement: S1 (10.1371/journal.pone.0035647.s001) [file journal.pone.0035647.s001]
