# Supplementary material for: Variable Copy Number, Intra-Genomic Heterogeneities and Lateral Transfers of the 16S rRNA Gene in Pseudomonas
Source: PLOS journal article supplement (doi:10.1371/journal.pone.0035647), 2012-04-24
Supplement: S4 (10.1371/journal.pone.0035647.s004) [file journal.pone.0035647.s004]

**Figure S4. Secondary structure of the two different alleles of 16S rRNA in the MFY30 strain.** The helix (position 450 to 482 in the *E. coli* numbering system) contains the variable V3 motif. Secondary structure was determined using the mfold v2.3 software (Zuker, 2003) with default parameters except for the temperature (30°C instead of 37°C). Variable nucleotides are in bold print.

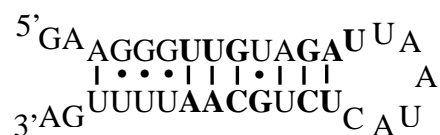

**Allele a**

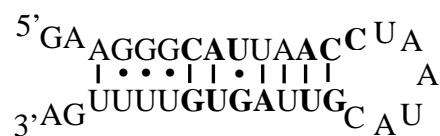

**Allele b**
