# Supplementary material for: Variable Copy Number, Intra-Genomic Heterogeneities and Lateral Transfers of the 16S rRNA Gene in Pseudomonas
Source: PLOS journal article supplement (doi:10.1371/journal.pone.0035647), 2012-04-24

**Figure S8. Phylogenetic occurrence of the major V6 hypervariable motif.** The phylogenetic tree was built from 1803 full-length 16S rRNA sequences of *Pseudomonas* available in the databases, after excluding the V1 region (see Fig. S7). The sequences noted by a red circle have the only V6 motif found in at least two r-clusters (see Table 4).

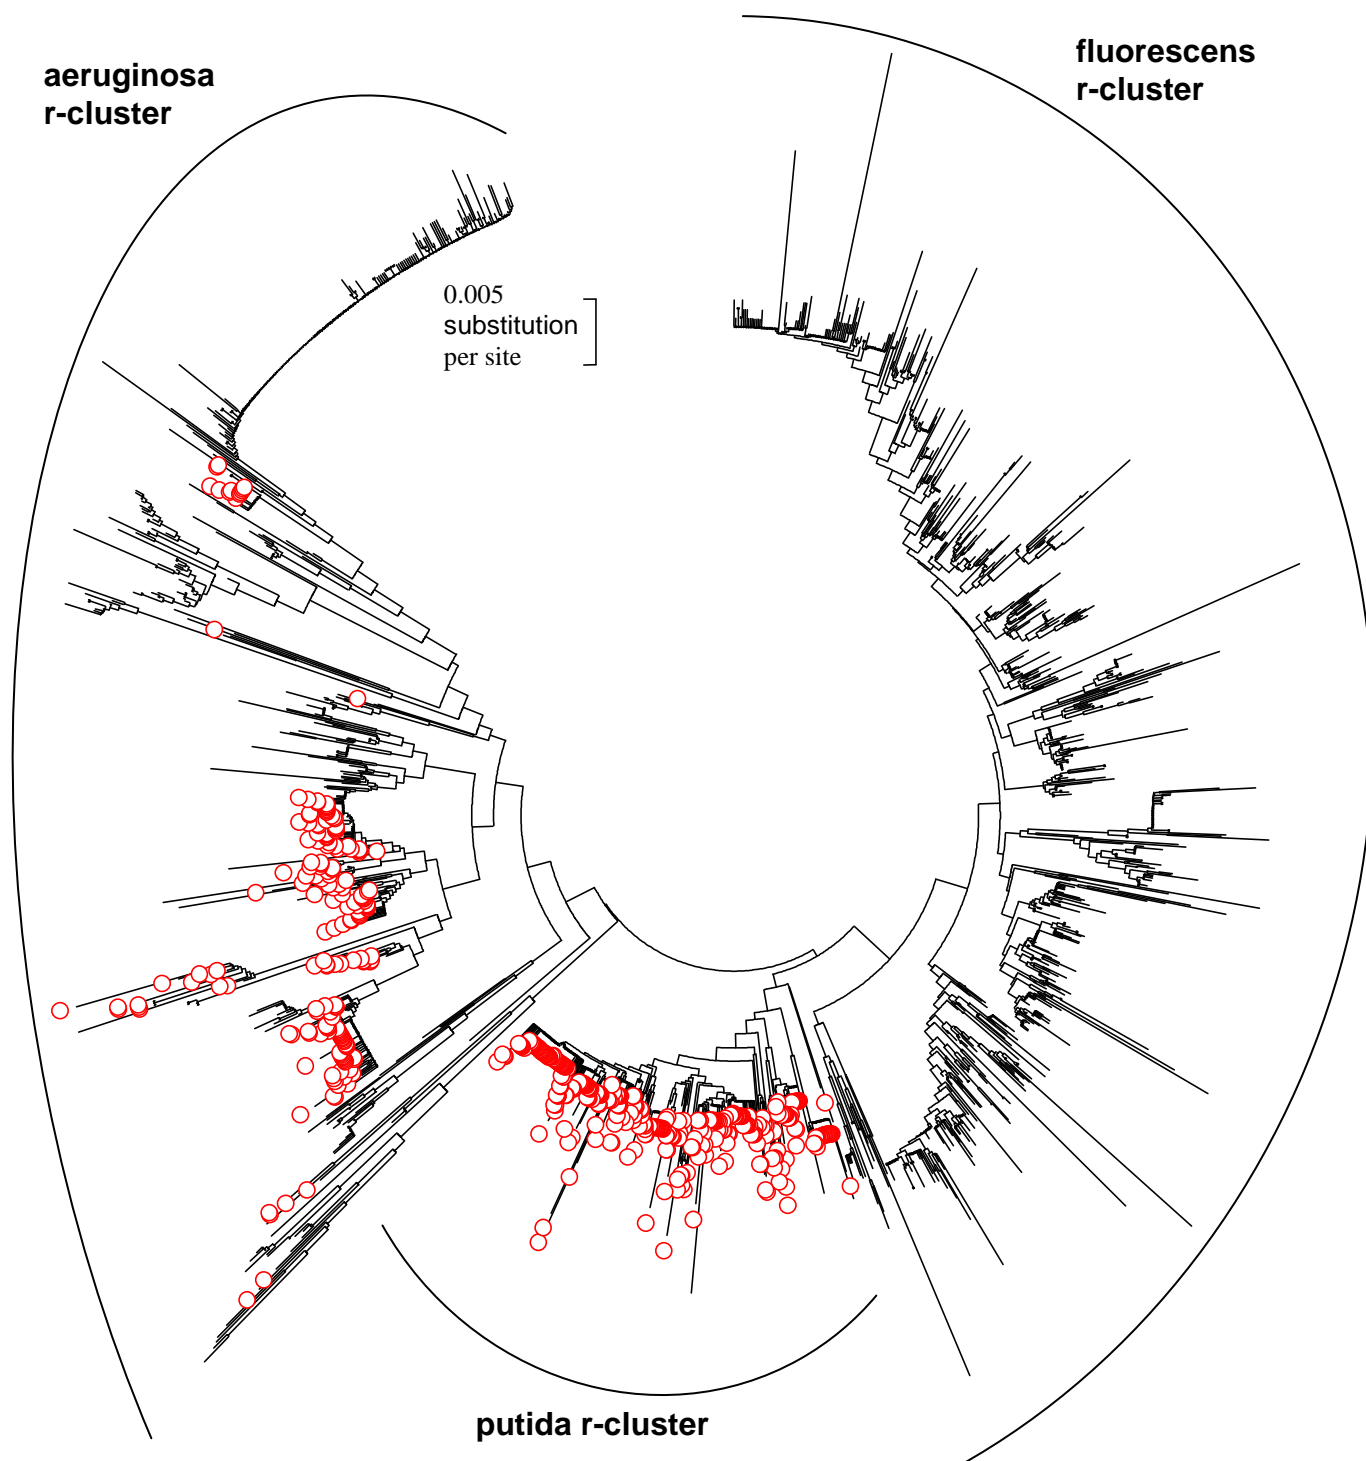

Supplement: S8 (10.1371/journal.pone.0035647.s008) [file journal.pone.0035647.s008]
